# Supplementary material for: Alemtuzumab treatment alters circulating innate immune cells in multiple sclerosis
Source: PubMed Central journal article supplement — Neurol Neuroimmunol Neuroinflamm. 2016 Oct 12;3(6):e289. doi: 10.1212/NXI.0000000000000289 (PMC5063395; doi:10.1212/nxi.0000000000000289), 2016-10-12
Supplement: supp_3.6.e289_Supplementary_Figures.pdf [file supp_3.6.e289_Supplementary_Figures.pdf]

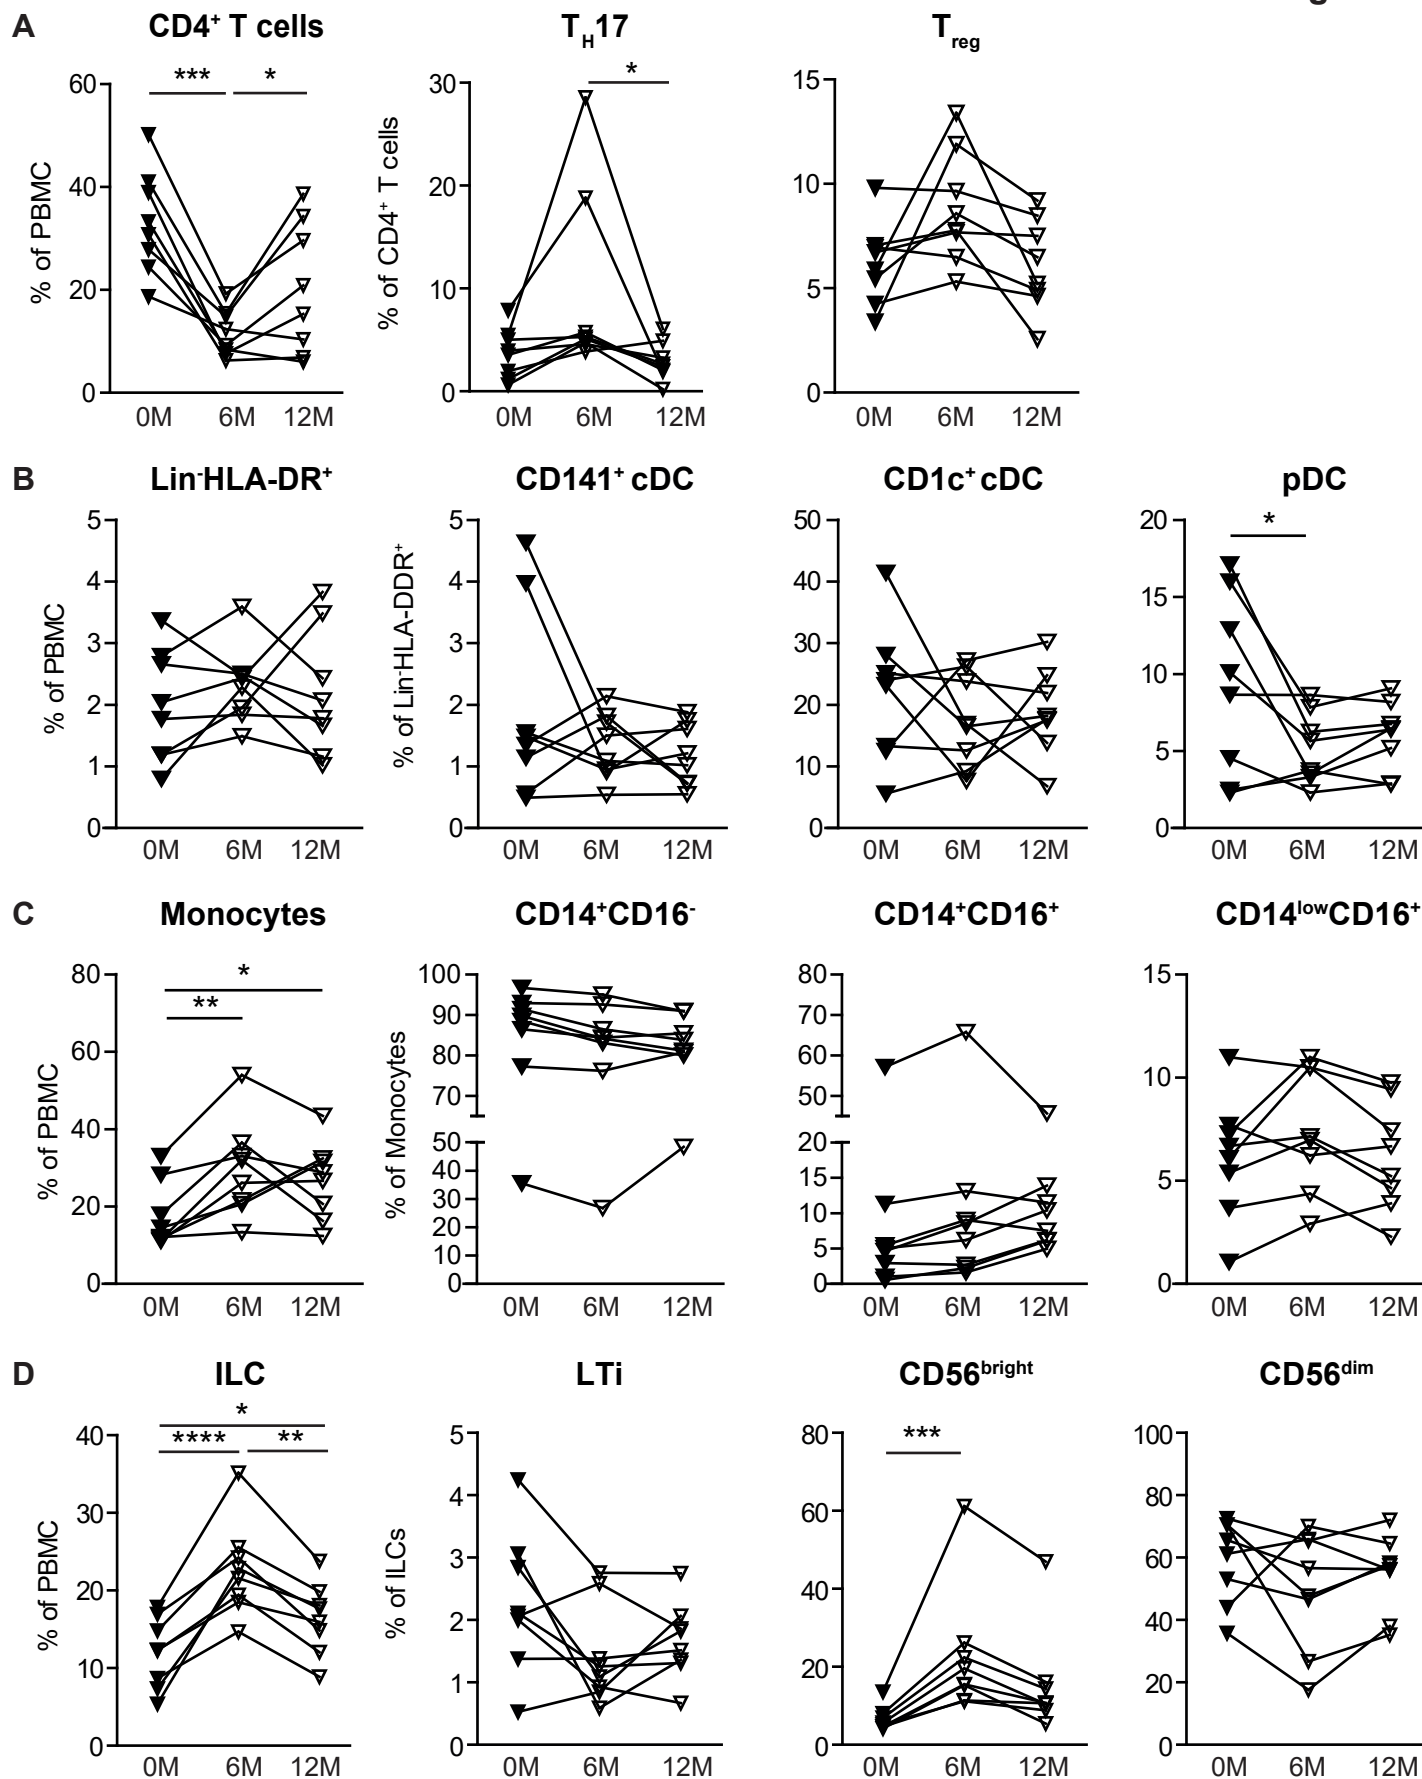

**Figure e-1:** Alemtuzumab-induced changes in the CD4<sup>+</sup> T cell and innate immune cell compartment after 6 and 12 months. (A) Graphs displaying proportions of CD4<sup>+</sup> T cell subsets derived from alemtuzumab treated RRMS patients (n=8) at baseline (filled triangles) and follow-up at 6-months and 12-months (open triangles). (B) Graphs displaying proportions of DC subsets derived from alemtuzumab treated RRMS patients (n=8) at baseline (filled triangles) and follow-up at 6-months and 12-months (open triangles). (C) Graphs displaying proportions of monocyte subsets derived from alemtuzumab treated RRMS patients (n=8) at baseline (filled triangles) and follow-up at 6-months and 12-months (open triangles). (D) Graphs displaying proportions of ILC subsets derived from alemtuzumab treated RRMS patients (n=8) at baseline (filled triangles) and follow-up at 6-months and 12-months (open triangles). P-values were calculated by RM-ANOVA with Bonferroni post-test, \*p<0.05, \*\*p<0.01, \*\*\*p<0.001, \*\*\*\*p<0.0001.

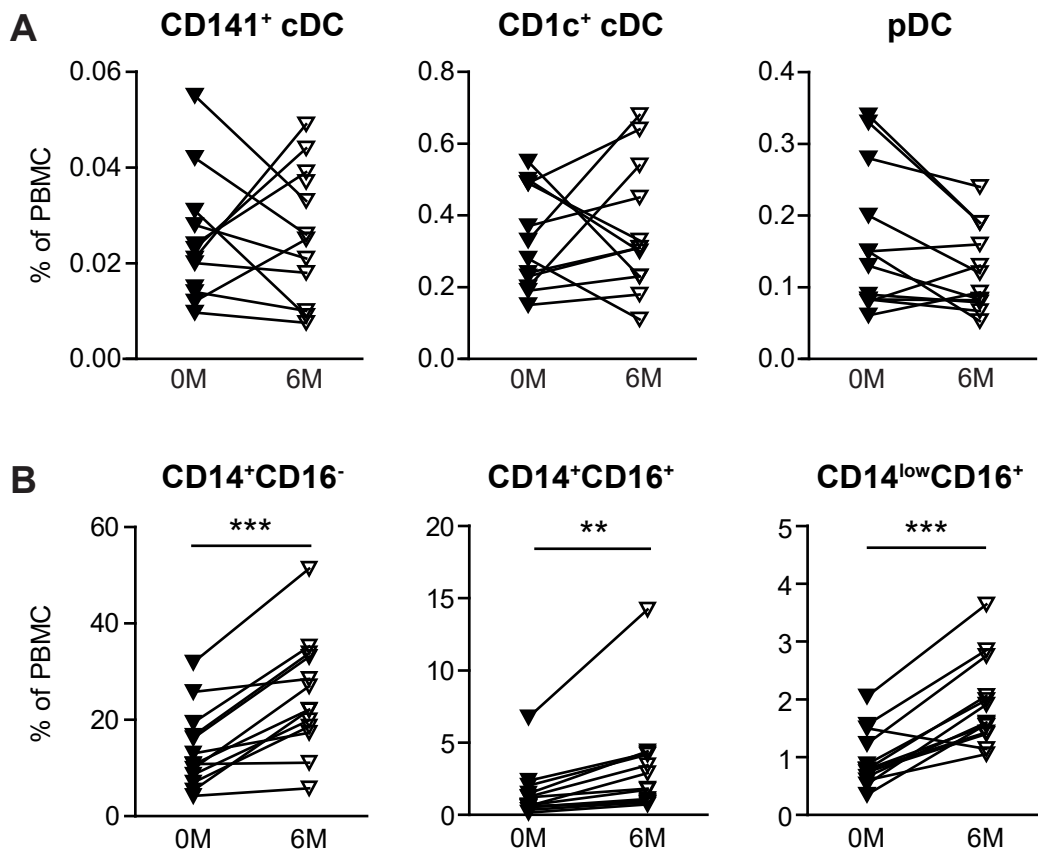

**Figure e-2:** Alemtuzumab-induced changes in the myeloid cell compartment. Graphs displaying PBMC proportions of (A) DC subsets and (B) monocyte subsets derived from alemtuzumab treated RRMS patients (n=12) at baseline (filled triangles) and follow-up at 6-months (open triangles). P-values were calculated by paired student  $t$ -test or Wilcoxon matched-pairs signed rank test, respectively, \* $p < 0.05$ , \*\* $p < 0.01$ , \*\*\* $p < 0.001$ .

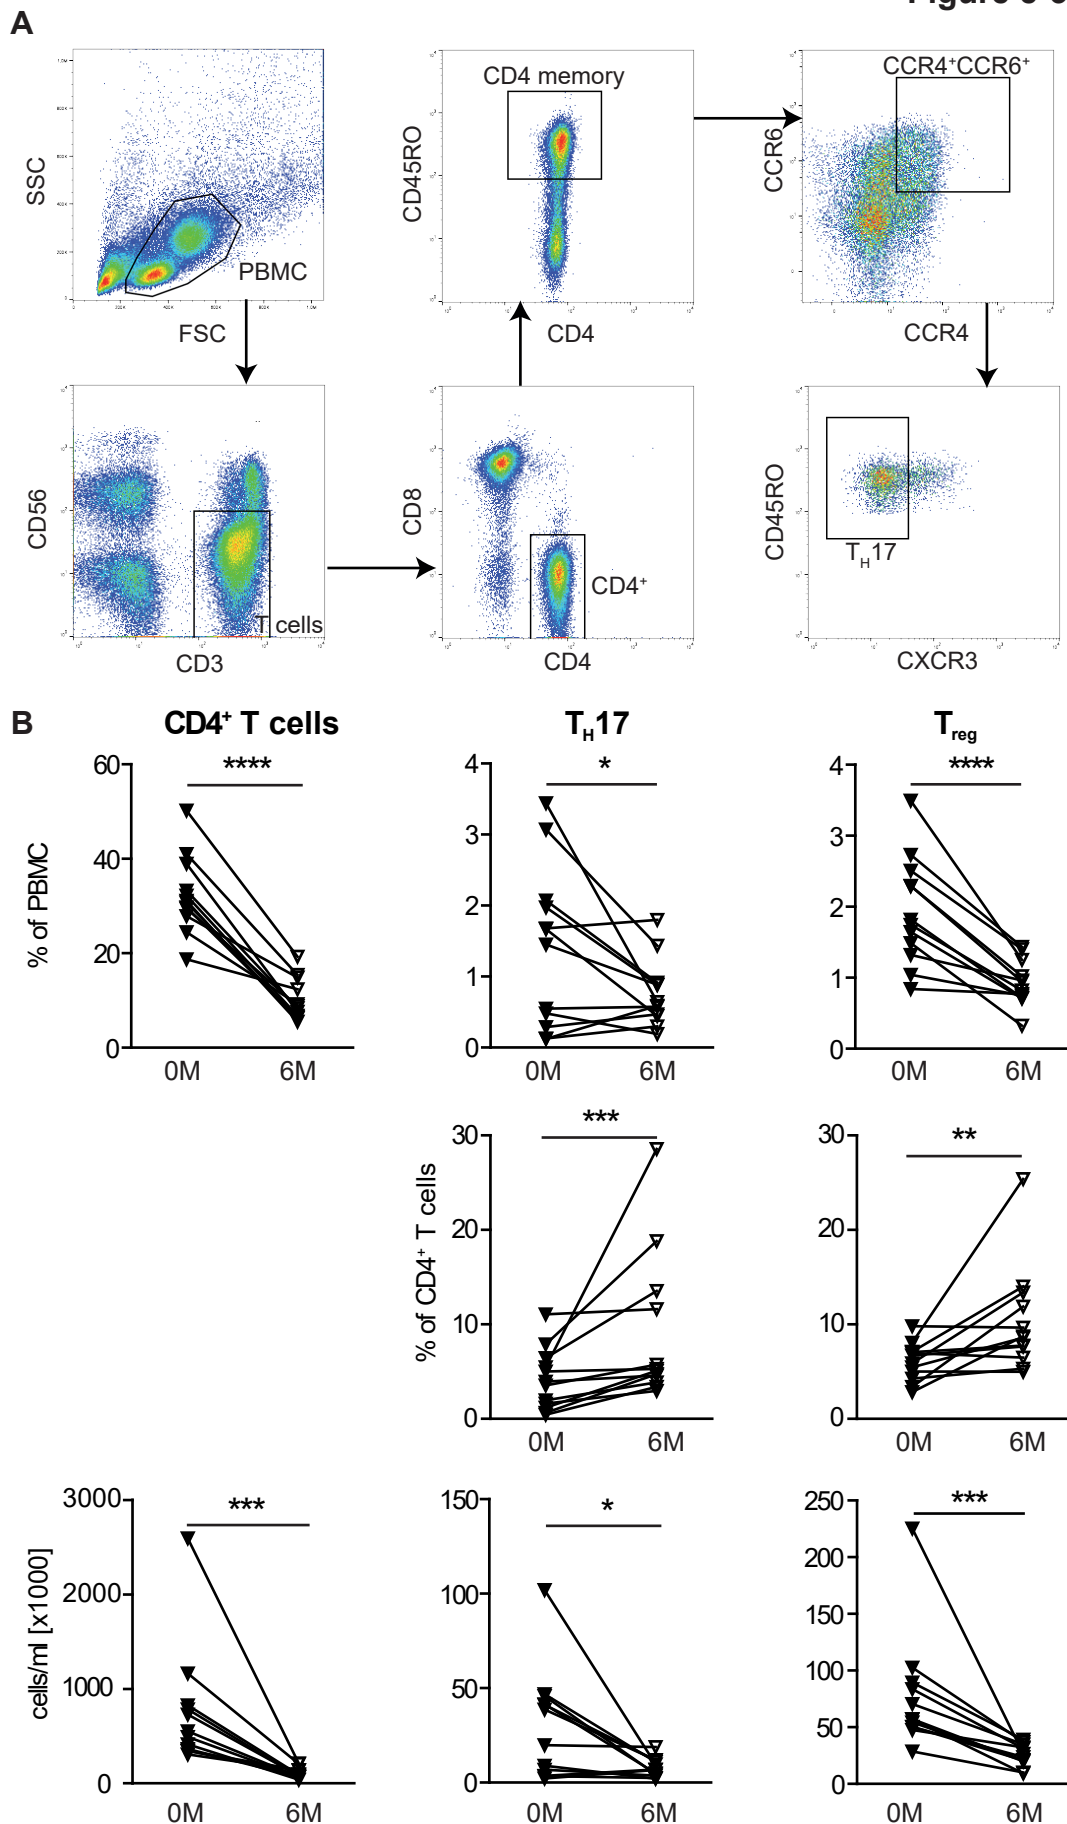

**Figure e-3:** Alemtuzumab-induced changes in the CD4<sup>+</sup> T cell compartment. (A) Gating strategy for T cell subsets. PBMCs were gated by FSC vs. SSC characteristics. T cells were selected based on the expression of CD3 and the absence of CD56. CD4<sup>+</sup>CD8<sup>-</sup>CD45RO<sup>+</sup> memory T cells were gated into CCR4<sup>+</sup>CCR6<sup>+</sup>CXCR3<sup>-</sup> TH17 cells, as described in literature.<sup>1</sup> (B) Graphs displaying proportions within PBMCs (upper row), within CD4<sup>+</sup> T cells (middle row), and total cell numbers (lower row) of CD4<sup>+</sup> T cell subsets derived from alemtuzumab treated RRMS patients (n=12) at baseline (filled triangles) and 6-month follow-up (open triangles). P-values were calculated by paired student *t*-test or Wilcoxon matched-pairs signed rank test, respectively, \**p*<0.05, \*\**p*<0.01, \*\*\**p*<0.001, \*\*\*\**p*<0.0001.

<sup>1</sup> Zielinski CE, Mele F, Aschenbrenner D, et al. Pathogen-induced human TH17 cells produce IFN-gamma or IL-10 and are regulated by IL-1beta. Nature 2012;484:514-518.

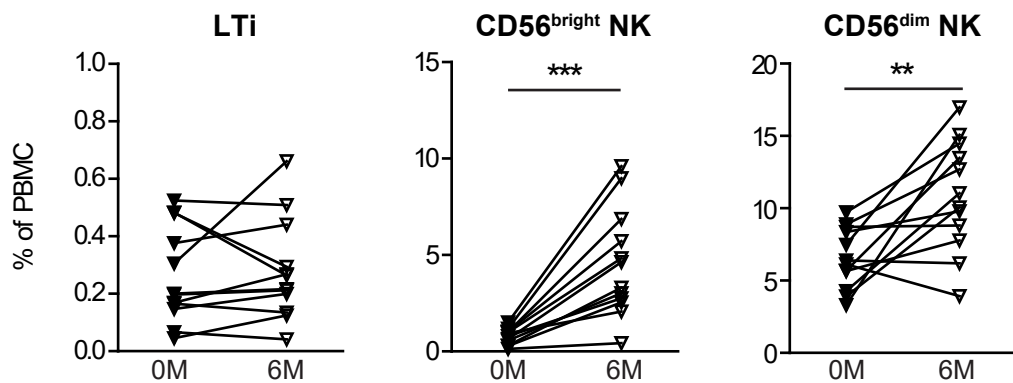

**Figure e-4:** Alemtuzumab-induced changes in the innate lymphoid cell compartment. Graphs displaying proportions of ILC subsets among PBMCs derived from alemtuzumab treated RRMS patients (n=12) at baseline (filled triangles) and at 6-month follow-up (open triangles). P-values were calculated by paired student t-test or Wilcoxon matched-pairs signed rank test, respectively, \*p<0.05, \*\*p<0.01, \*\*\*p<0.001.

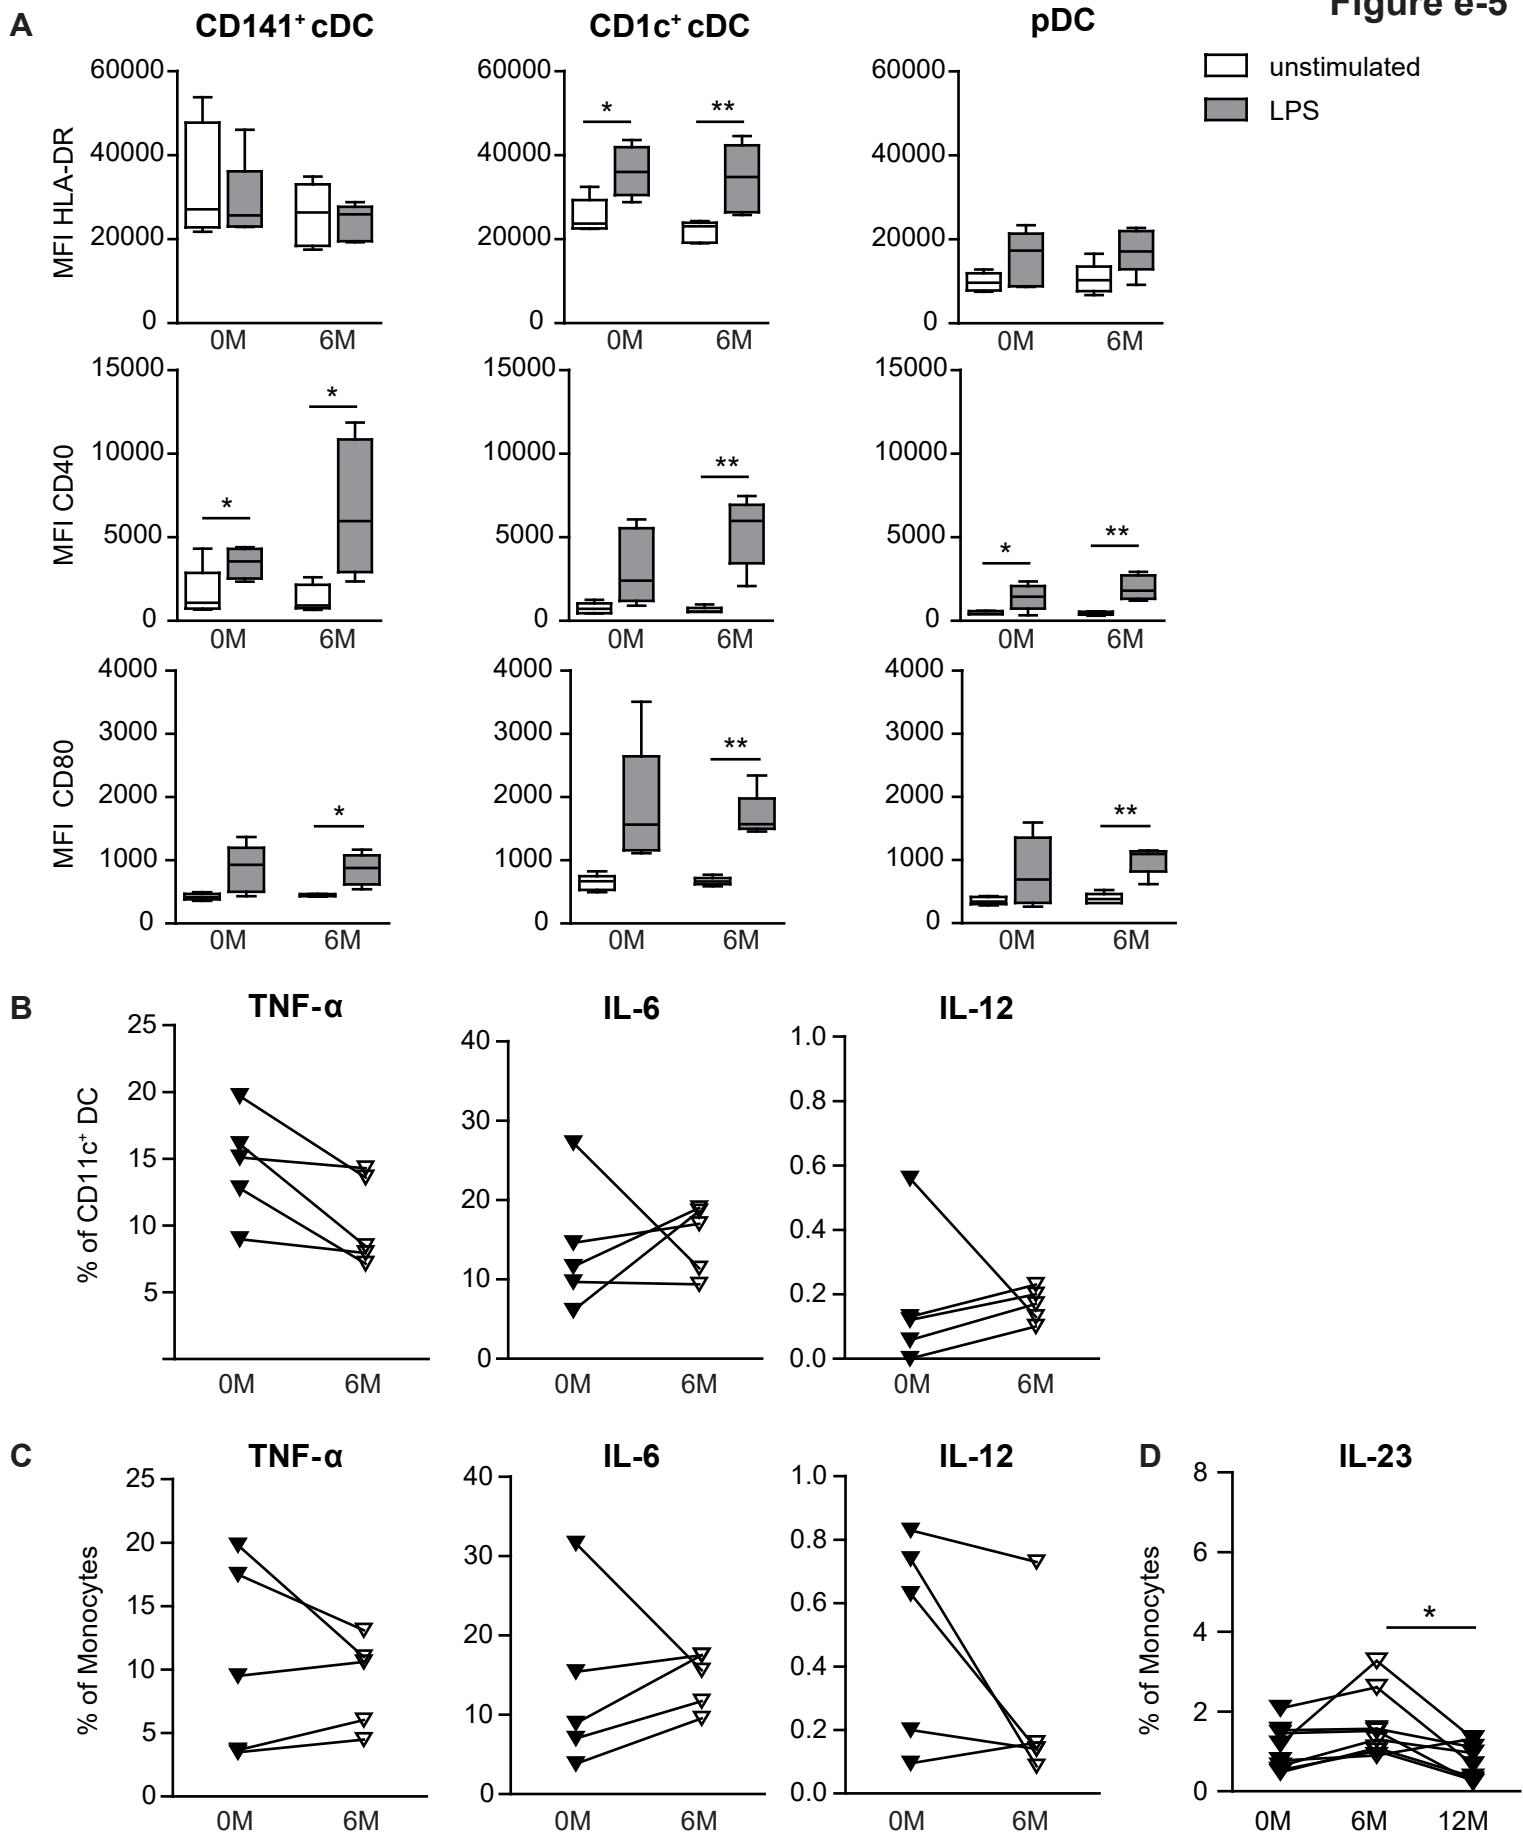

**Figure e-5:** Expression of maturation markers and cytokine production by myeloid cells after alemtuzumab treatment. (A) Graphs displaying the MFI of HLA-DR (upper row), CD40 (middle row) and CD80 (bottom row) of conventional CD141<sup>+</sup> and CD1c<sup>+</sup> DCs and pDCs in unstimulated (open boxes) and LPS-stimulated (closed boxes) condition. (B) Graphs displaying proportions of cytokine producing DCs at baseline (closed triangles) and 6 months (open triangles) after alemtuzumab therapy. (C) Graphs displaying proportions of cytokine producing monocytes at baseline and 6 months after alemtuzumab therapy. PBMCs were derived from alemtuzumab treated RRMS patients (n=5) at baseline (0M) and 6-month follow-up (6M). (D) Graphs displaying proportions of IL-23 producing monocytes (n=8) at baseline and 6 and 12 months after alemtuzumab therapy. P-values were calculated by paired student  $t$ -test (A-C) and with RM-ANOVA with Bonferroni post-test (D), \*p<0.05, \*\*p<0.01.
